# Supplementary material for: Comparative Study of Field-Effect Transistors Based on Graphene Oxide and CVD Graphene in Highly Sensitive NT-proBNP Aptasensors
Source: MDPI journal article supplement (doi:10.3390/bios14050215), 2024-04-26
Supplement: s1 [file s1]

Supplementary Information

# Comparative Study of Field-Effect Transistors Based on Graphene Oxide and CVD Graphene in Highly Sensitive NT-proBNP Aptasensors

Anastasiia Kudriavtseva <sup>1,†</sup>, Stefan Jarić <sup>2,†</sup>, Nikita Nekrasov <sup>1</sup>, Alexey V. Orlov <sup>3</sup>, Ivana Gadjanski <sup>2</sup>, Ivan Bobrinetskiy <sup>2</sup>, Petr I. Nikitin <sup>3,\*</sup> and Nikola Knežević <sup>2,\*</sup>

<sup>1</sup> Center for Probe Microscopy and Nanotechnology, National Research University of Electronic Technology, Moscow, Zelenograd 124498, Russia;

<sup>2</sup> BioSense Institute—Research and Development Institute for Information Technologies in Biosystems, University of Novi Sad, 21000 Novi Sad, Serbia; sjaric@biosense.rs (S.J.); igadjanski@biosense.rs (I.G.);

<sup>3</sup> Prokhorov General Physics Institute of the Russian Academy of Sciences, Moscow 119991, Russia;

\* Correspondence: petr.nikitin@nsc.gpi.ru (P.I.N.); nknezevic@biosense.rs (N.K.)

† These authors contributed equally to this work.

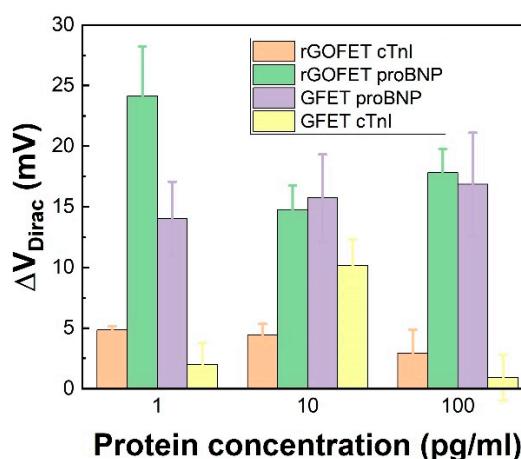

**Figure S1.** Sensitivity of rGO-FET and GFET based biosensors to nonspecific biomarkers (cTnI and proBNP).
